# Supplementary material for: TGF-β Controls miR-181/ERK Regulatory Network during Retinal Axon Specification and Growth
Source: PubMed Central journal article supplement (PMC4671616; doi:10.1371/journal.pone.0144129), 2015-12-07
Supplement: pone.0144129.s003.pdf [file pone.0144129.s003.pdf]

## S1 Supporting Text: Controls for MO injections

MO-TGF $\beta$ R1 was designed to sterically block the fourth splice donor site of Ol.*TGF $\beta$ R1* transcript (Fig. S1a). The blocking efficiencies of the MO-TGF $\beta$ R1 were verified by PCR using a pair of oligonucleotide primers (Ol.*tgf $\beta$ r1.ex3F*-5'GAGCTGATTCCACGAGACCG3'; Ol.*tgf $\beta$ r1.ex5R*-5'CTTCACCGCAACCTCCTCGC3') designed on the flanking exons (exon3 and exon5, Fig. S1a). PCR analysis revealed that the MO-TGF $\beta$ R1 caused a partial retention of an intron as shown by the presence of a higher band amplified in MO-TGF $\beta$ R1 injected embryos with respect to controls (Fig. S1a).

Activation of p53 is an occasional off-targeting effect of knockdown strategies that induce neuronal p53-dependent cell death accompanied by abnormal tissue development, such as microcephaly, microphthalmia, and others<sup>1</sup>. In this case, the phenotype can be rescued by co-injection of a MO against p53<sup>2</sup>. We sought to exclude that the phenotype in TGF $\beta$ R1 morphants was related to non-specific neural cell death in response to the injection of our MO. Therefore, we co-injected MO-TGF $\beta$ R1 with an MO against p53 (MO-p53)<sup>3</sup>. Of note, there were no modifications of the morphant phenotype (data not shown), which confirmed the specificity of the MO-TGF $\beta$ R1 targeting and the absence of the occasional off-targeting effect due to the knock-down strategy.

1. Robu, M. E. *et al.* p53 activation by knockdown technologies. *PLoS Genetics* 3, e78, doi:10.1371/journal.pgen.0030078 (2007).
2. Eisen, J. S. & Smith, J. C. Controlling morpholino experiments: don't stop making antisense. *Development* 135, 1735-1743, doi:10.1242/dev.001115 (2008).
3. Conte, I. *et al.* miR-204 is required for lens and retinal development via Meis2 targeting. *Proc Natl Acad Sci U S A* 107, 15491-15496, doi:0914785107 [pii].
